# Supplementary material for: Stumbling corrective reaction elicited by mechanical and electrical stimulation of the saphenous nerve in walking mice
Source: Oxford University Press journal article supplement (doi:10.1242/jeb.178095), 2018-01-01
Supplement: jeb178095supp.pdf [file jeb178095supp.pdf]

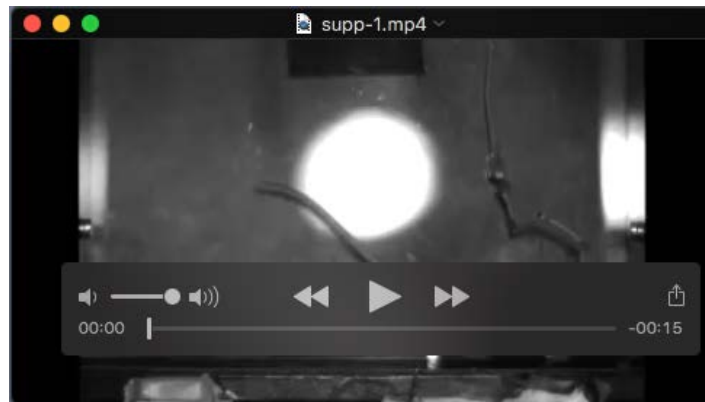

**Movie 1. Stumbling corrective reaction elicited by mechanically perturbing the swing movement.** Third swing movement is perturbed with a metallic hook.

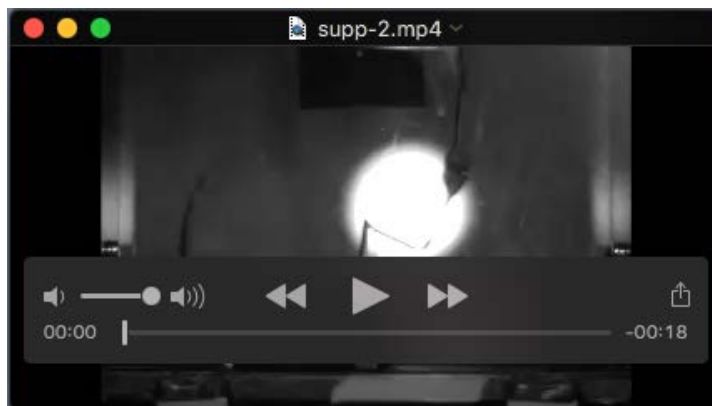

**Movie 2. Stumbling corrective reaction elicited by electrical stimulation of the saphenous nerve during swing.** The electrical stimulation occurred during the progression of the third swing movement.
